# Supplementary figures and images for: FAK Inhibition Demonstrates Dual Effects of Tumor Suppression and Dormancy Induction Through Region-Specific COUP-TF1 Regulation
Source: Research Square preprint supplement (doi:10.21203/rs.3.rs-7615921/v1), 2025-10-17

Supplementary data


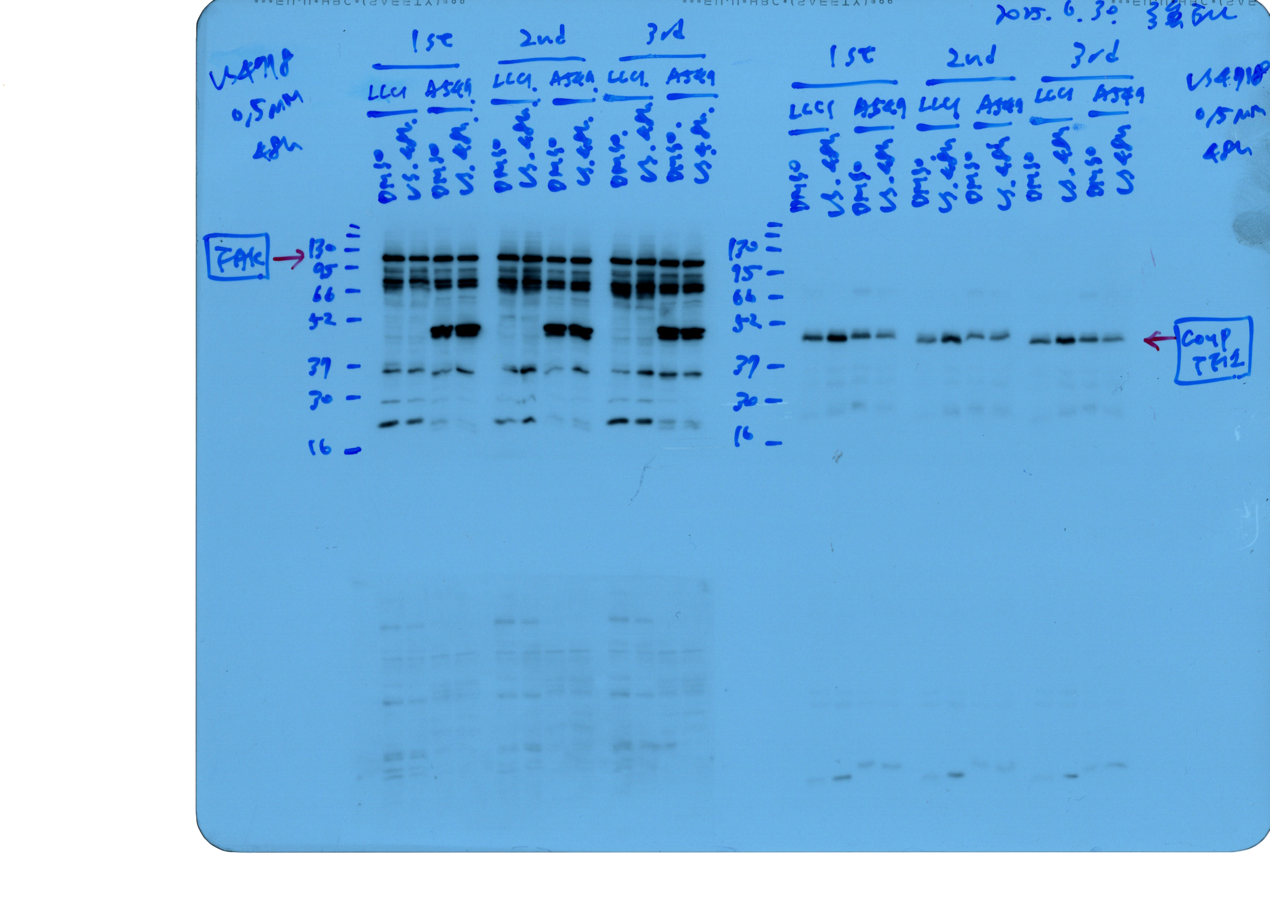

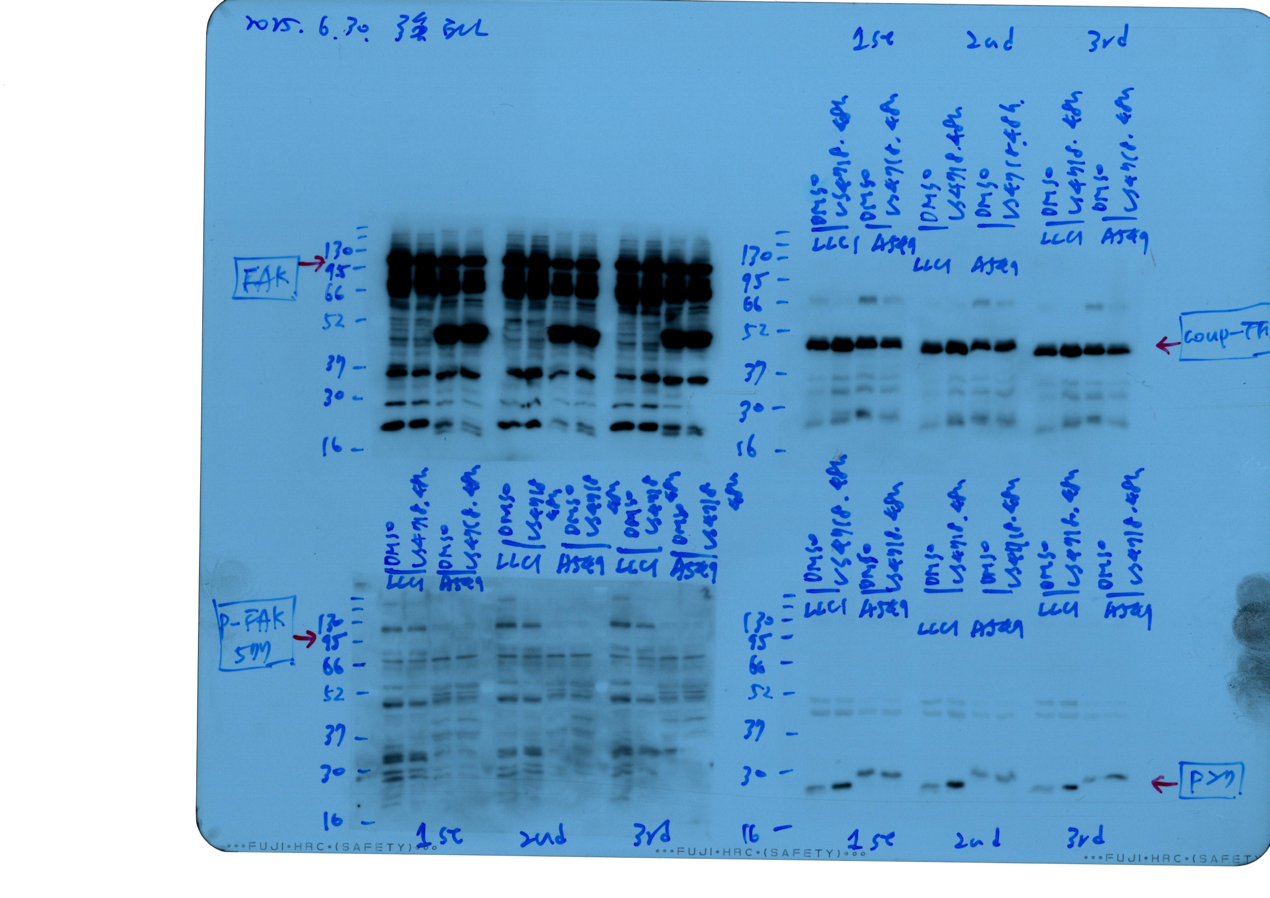

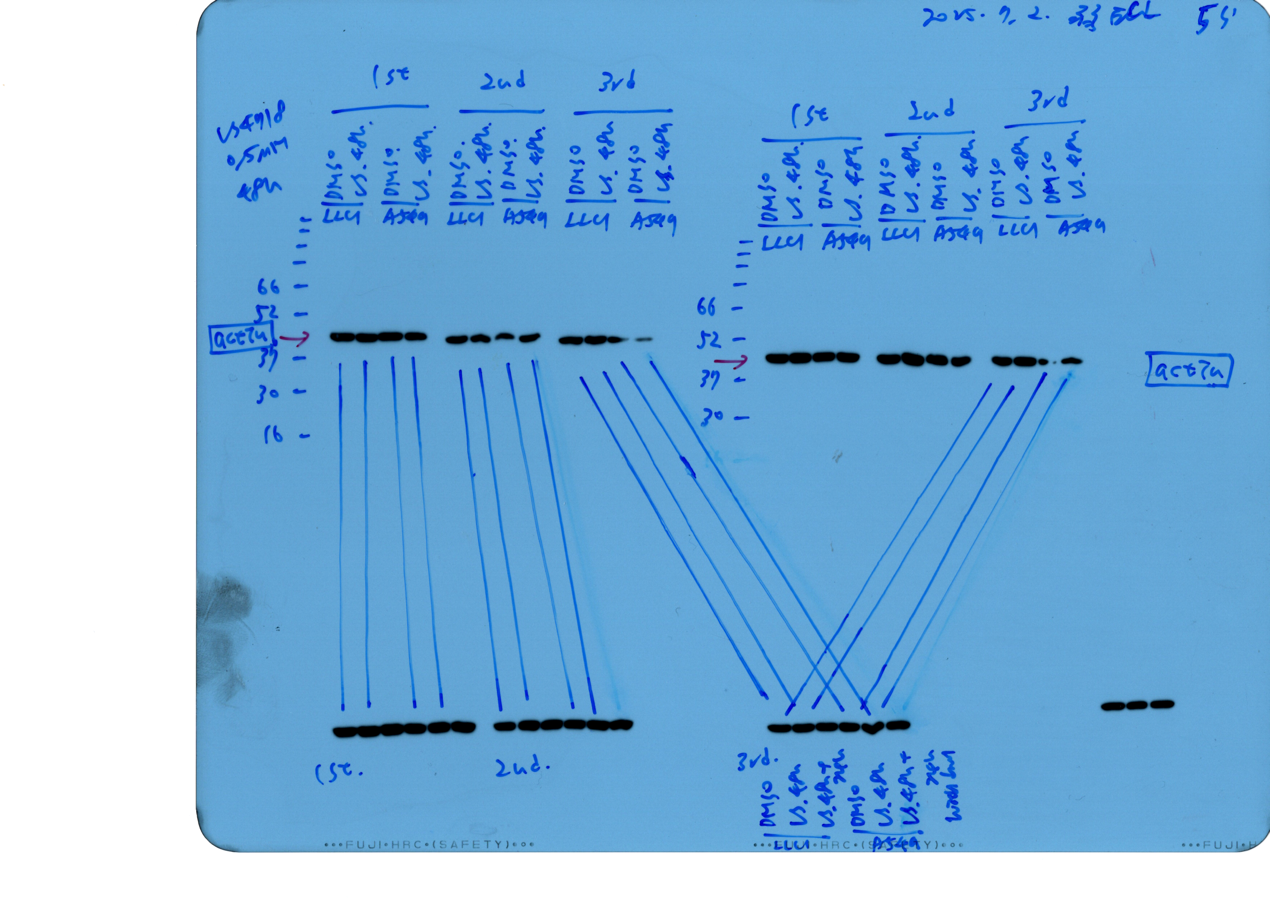

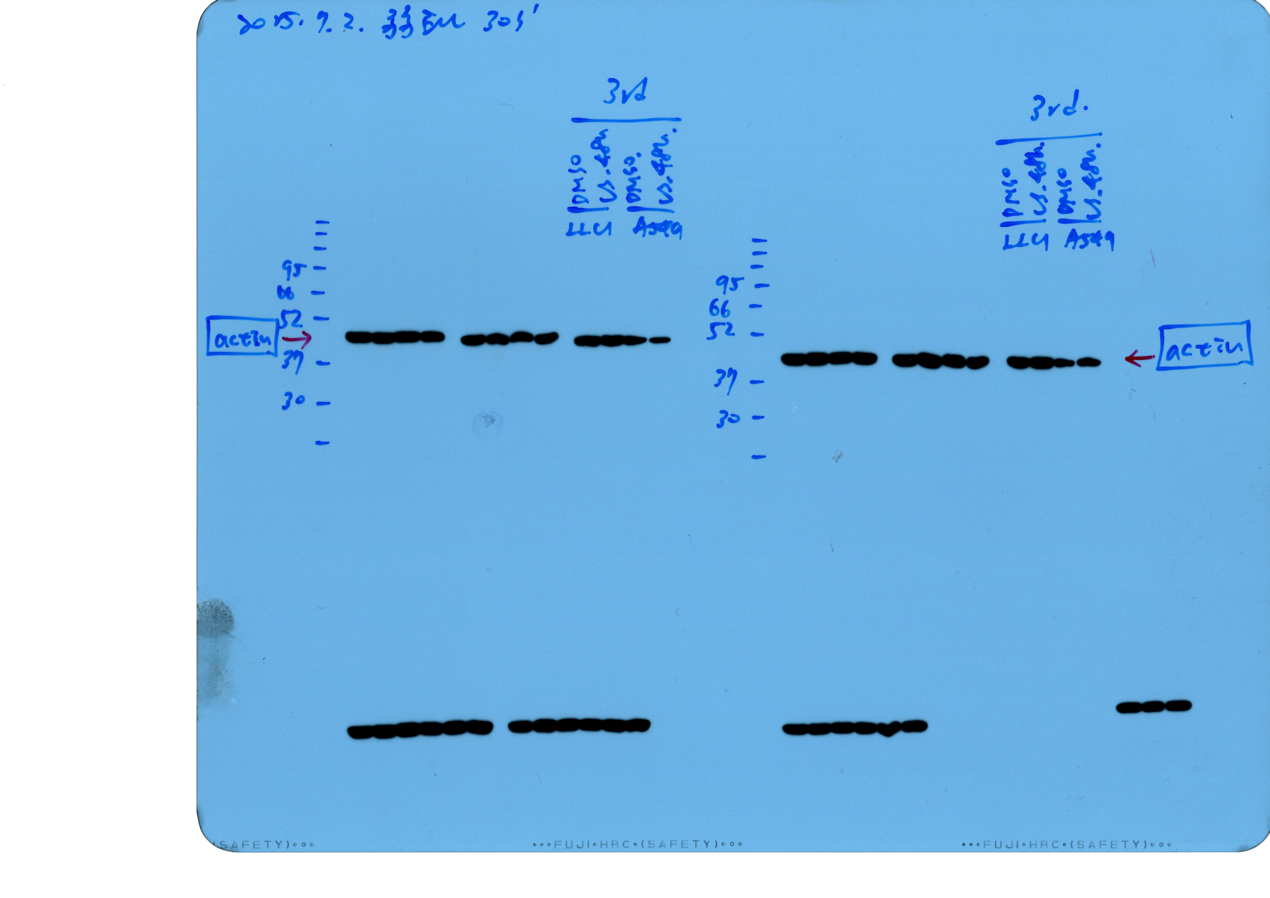

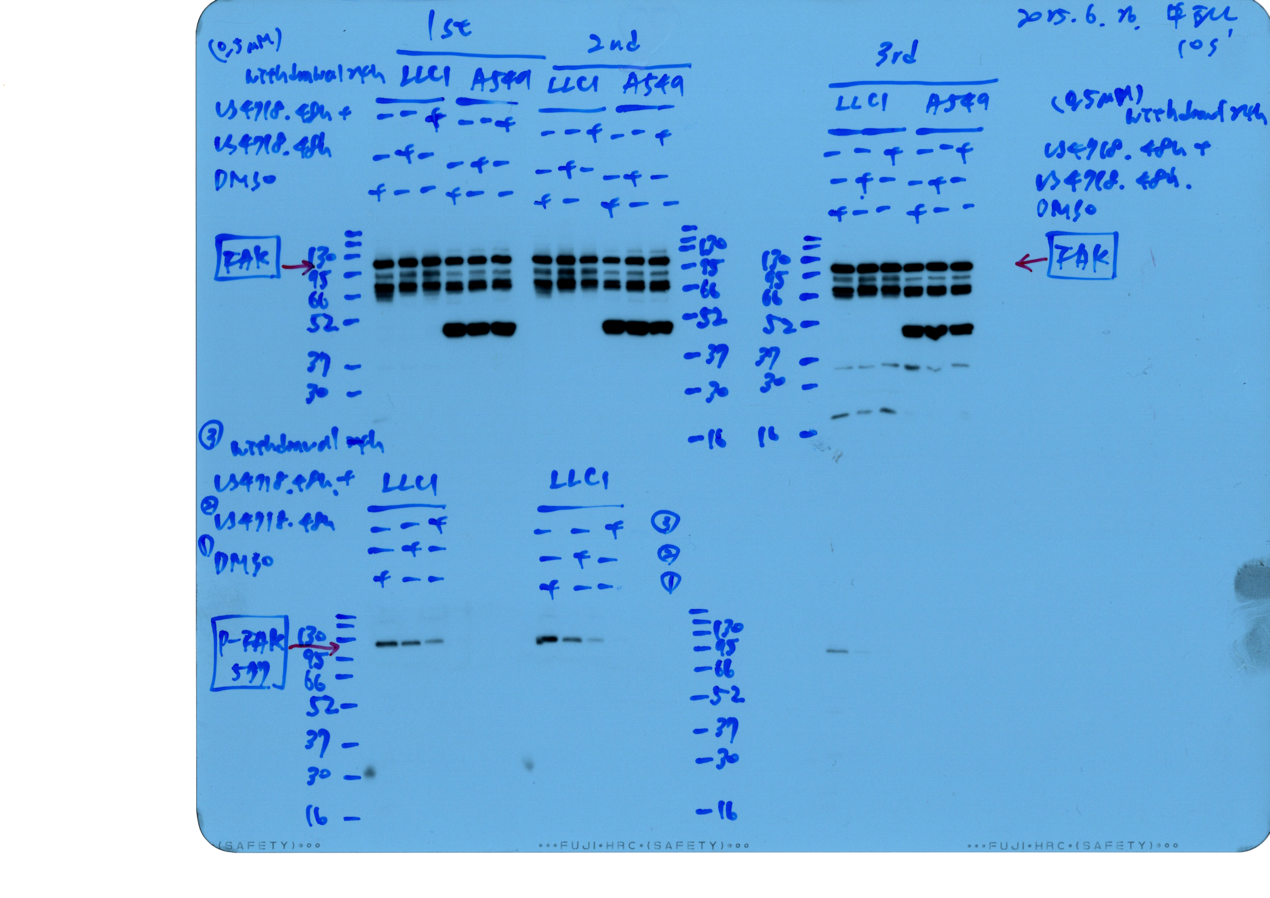

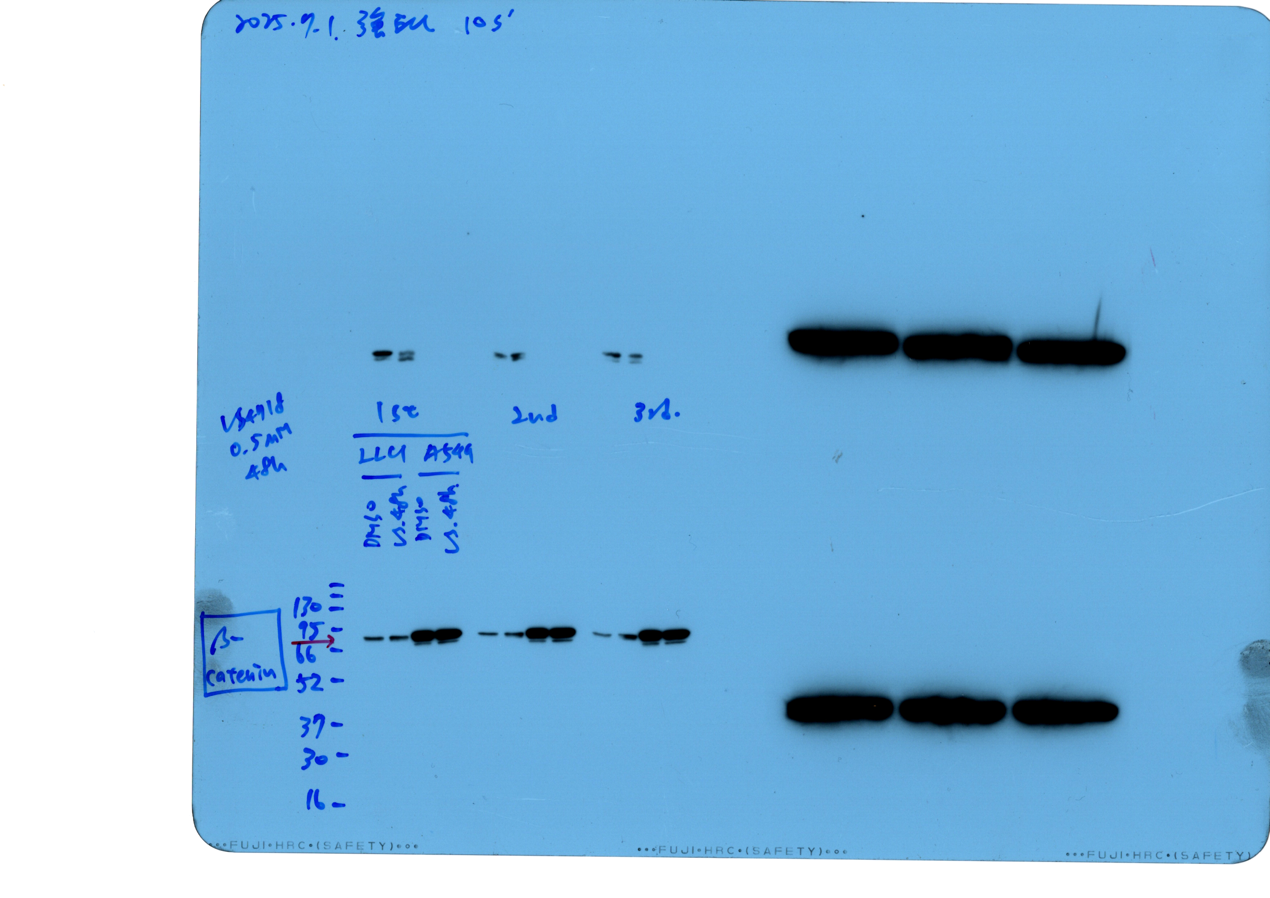

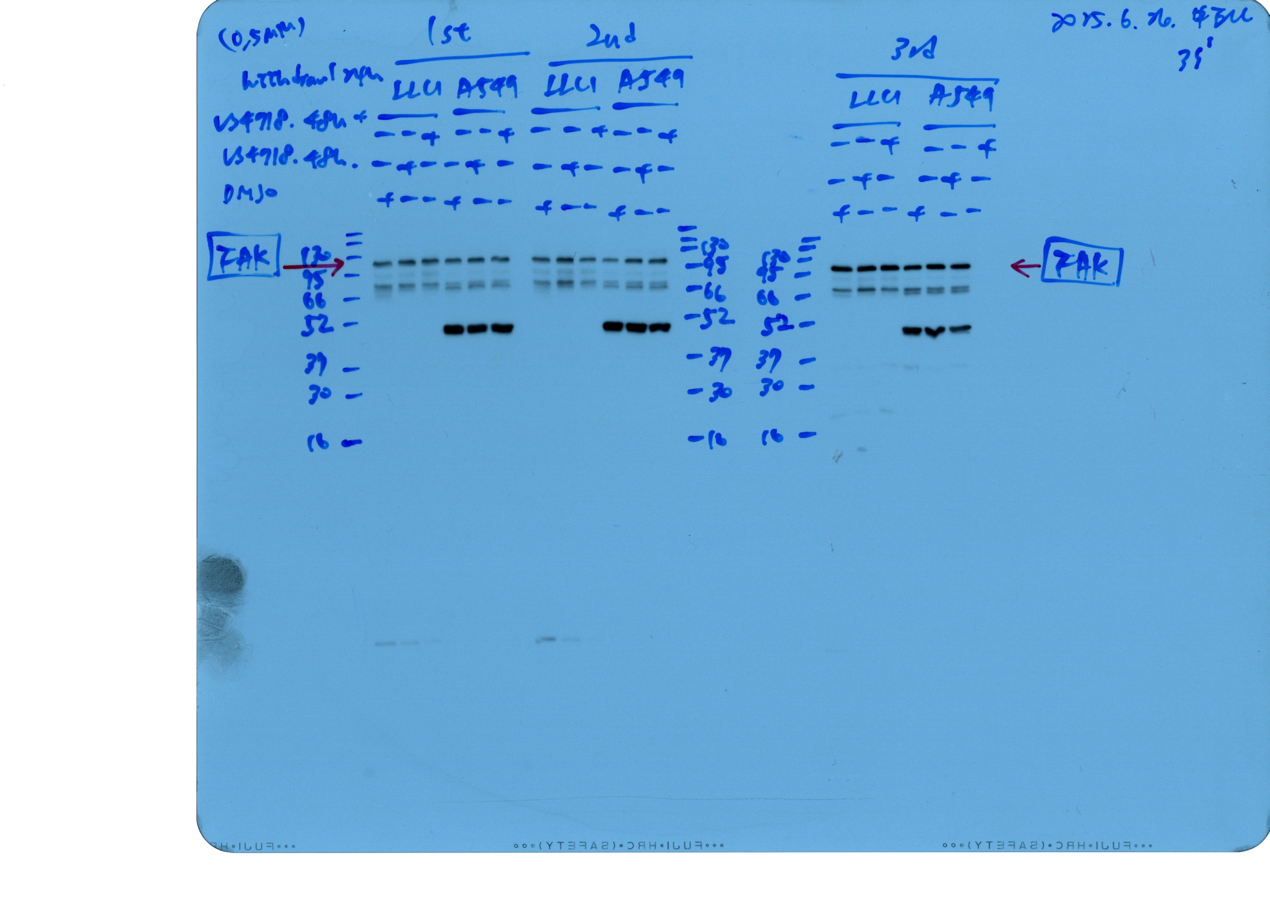

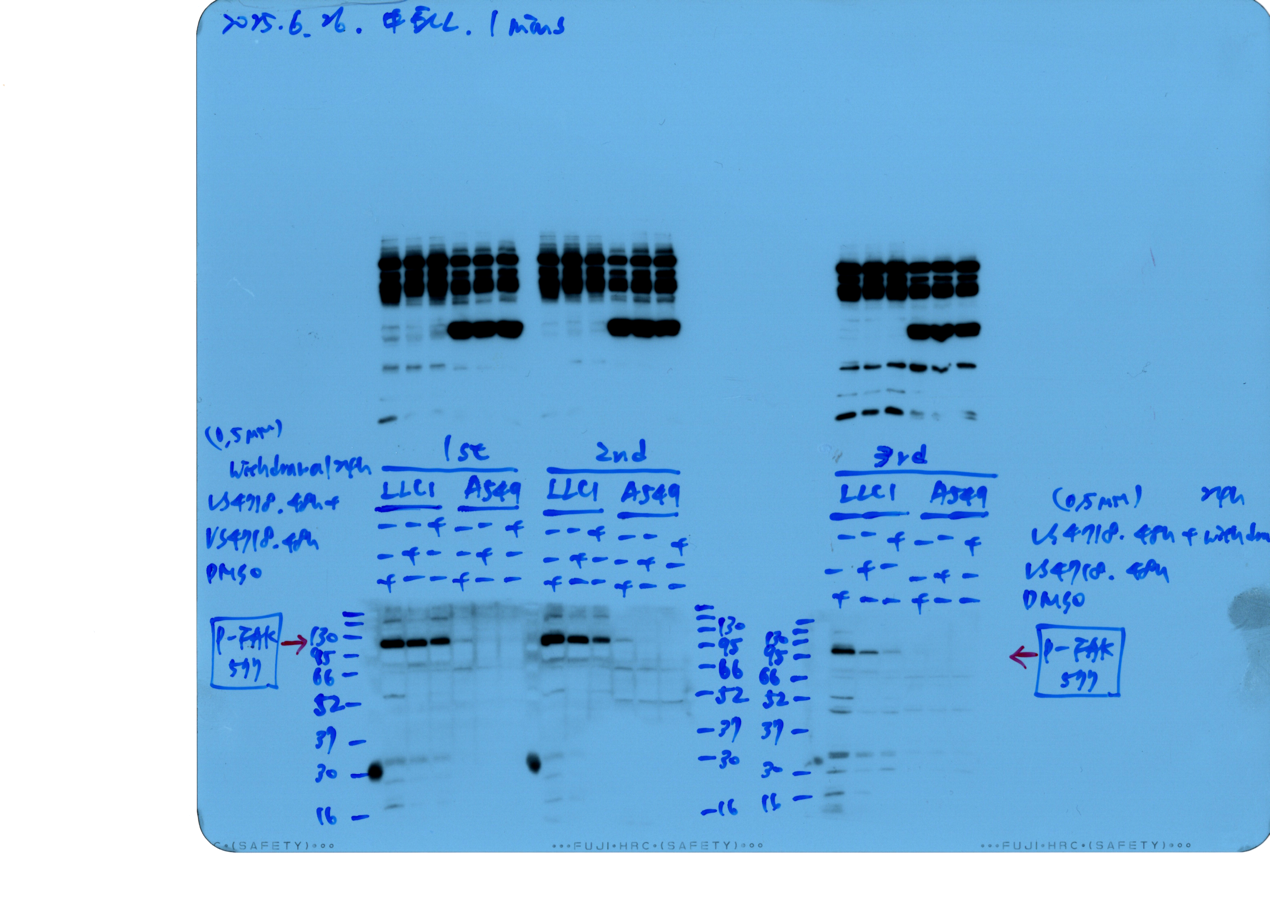

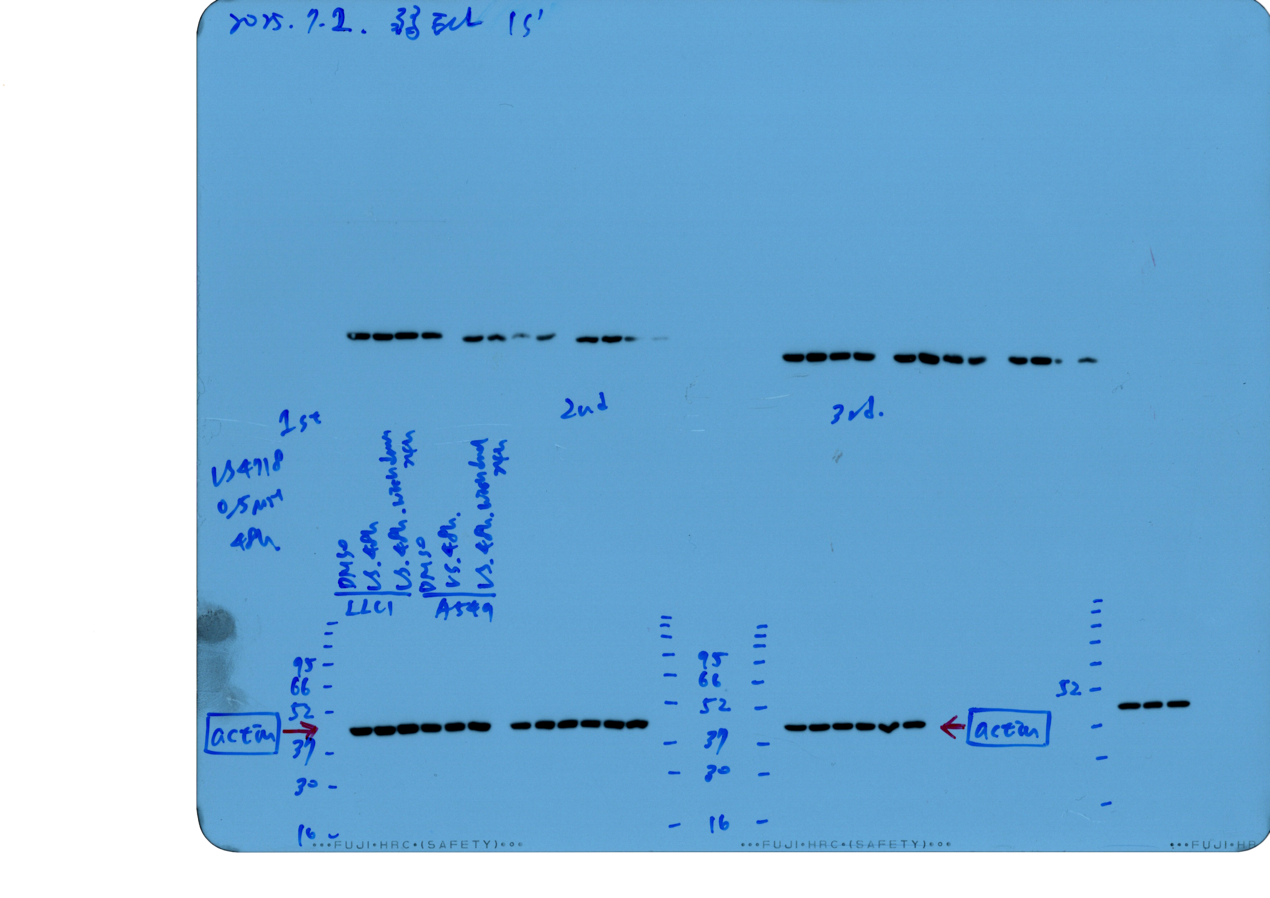

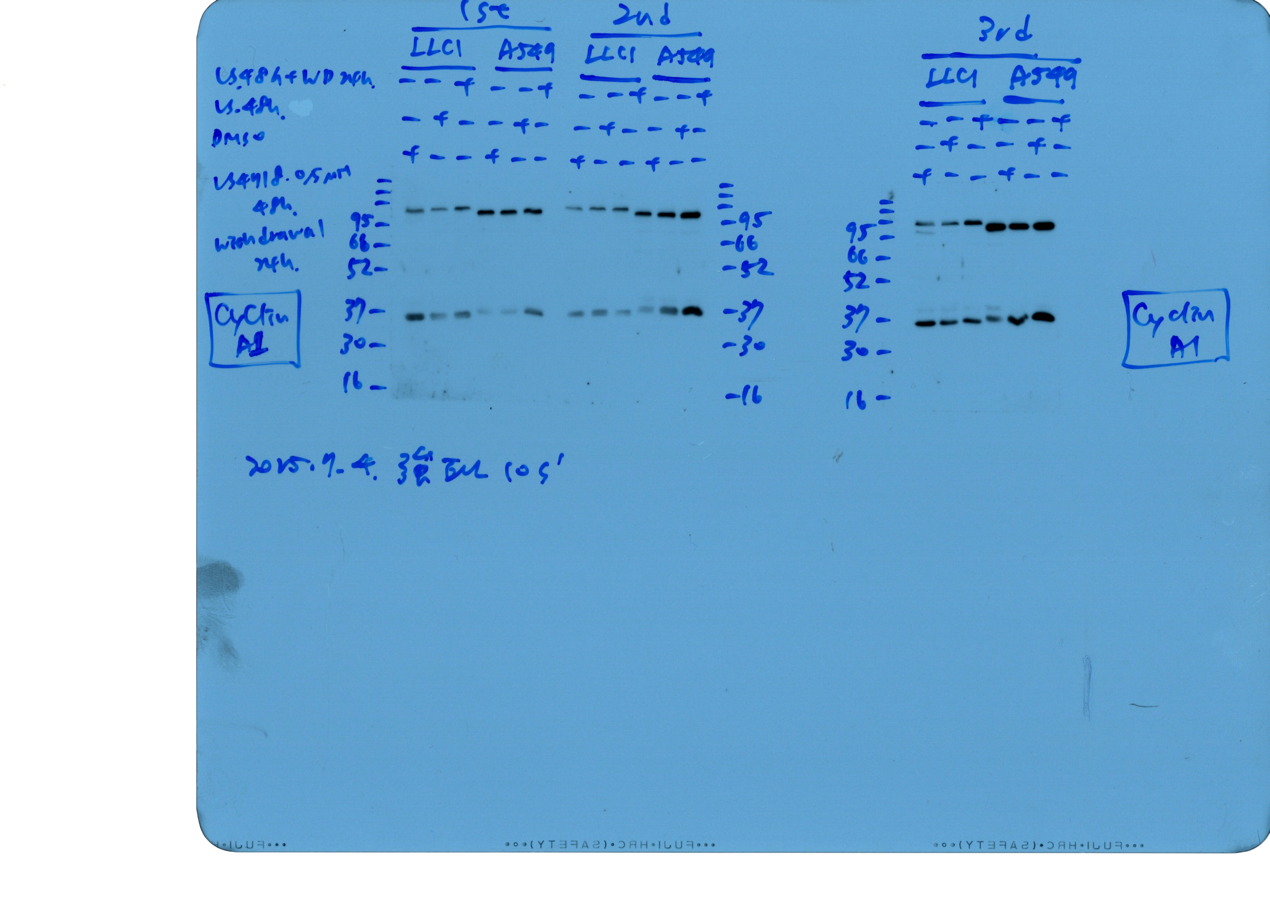

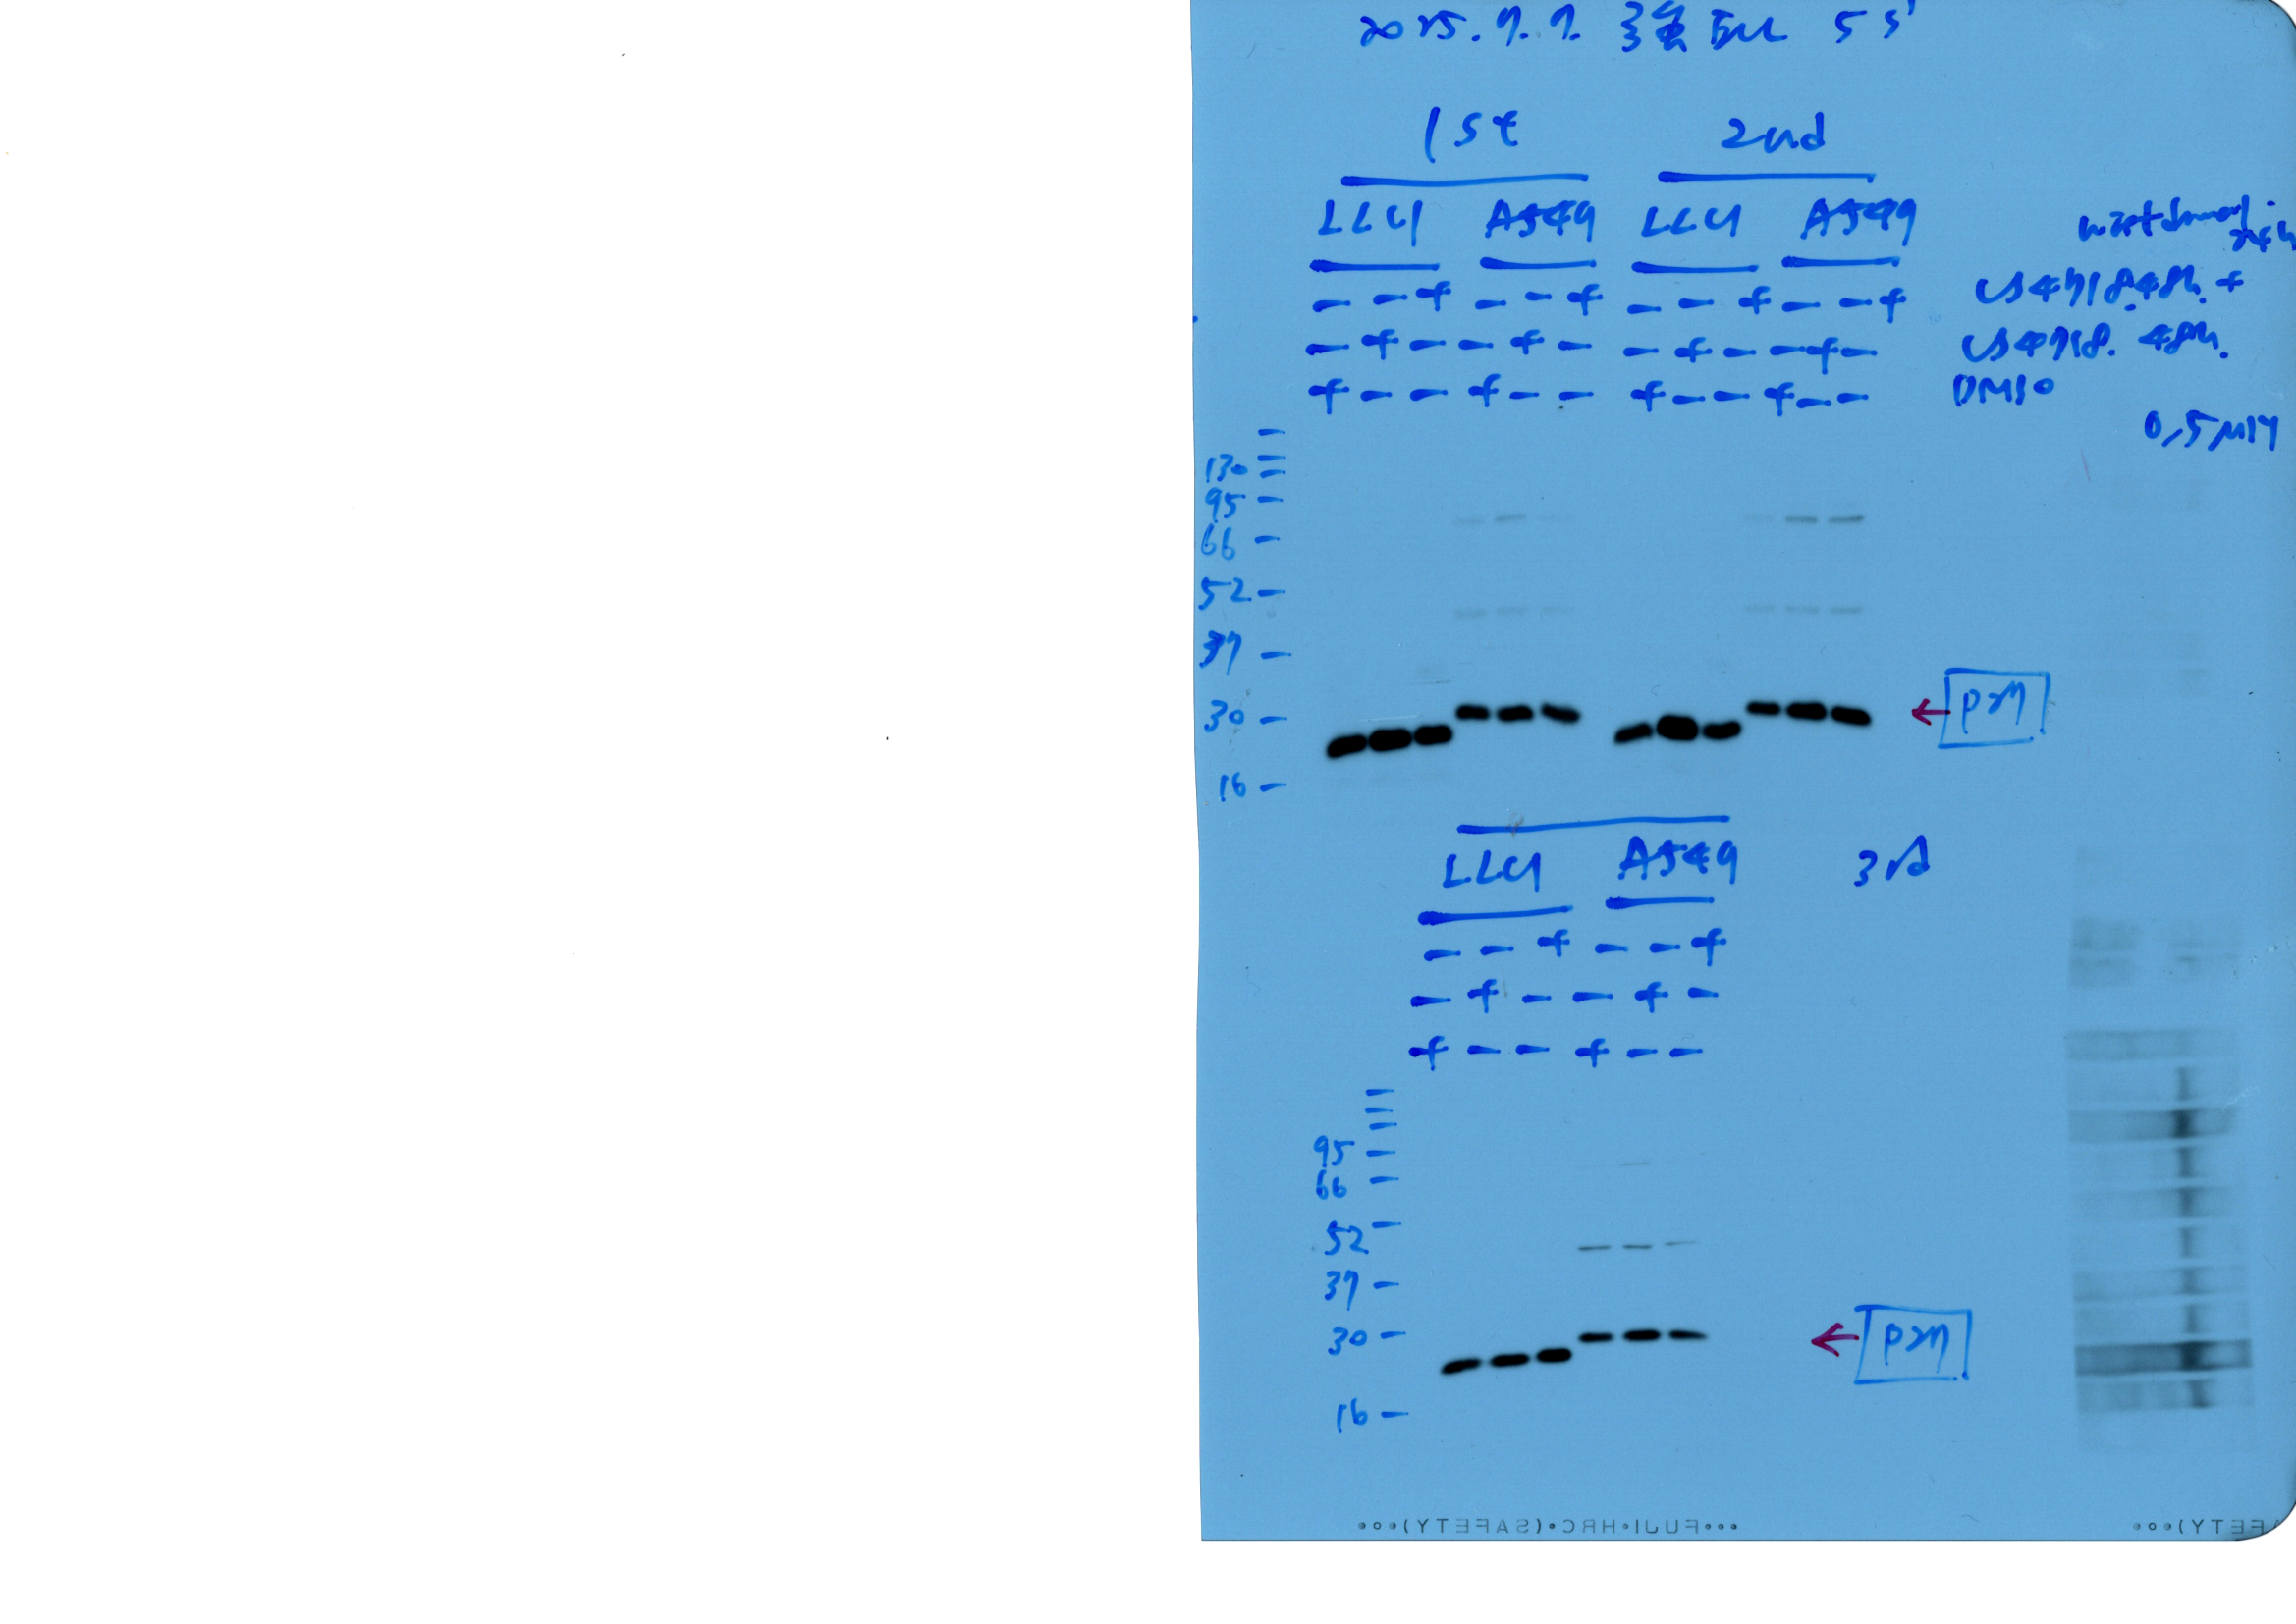

Supplement: Supplementary file 1 [file c0831edd38ee78c61db8f911.docx]
